# Supplementary material for: Palladium catalysed cyclisation–carbonylation of enynes to give cyclic γ,δ-unsaturated acidsElectronic supplementary information (ESI) available: data for novel compounds. See http://www.rsc.org/suppdata/cc/b3/b300719g/
Source: Royal Society of Chemistry journal article supplement (doi:10.1039/b300719g), 2003-04-02
Supplement: b300719g.doc [file b300719g.doc]

# Palladium catalysed cyclisation-carbonylation of enynes to give cyclic ,-unsaturated acids.

Varinder K. Aggarwal,**a* Mike Butters*b* and Paul W. Davies*a*

a School of Chemistry, Bristol University, Cantock’s Close, Bristol, UK BS8 1TS. Fax: +44 (0)117 929 8611; Tel: +44 (0)117 954 6315; E-mail: [v.aggarwal@bristol.ac.uk](mailto:v.aggarwal@bristol.ac.uk)

b AstraZeneca R&D Avlon Works, Severn Road, Bristol, UK BS10 7ZE.

# Supplementary information: data for novel compounds

## General directions

Chromatography: Flash chromatography was performed on silica gel (Merck Kiesegel 60, 230-400 mesh). TLC was performed on aluminium backed silica plates (60F254, 0.2 mm) which were developed using standard visualising agents: UV fluorescence (254 and 366 nm), phosphomolybdic acid/∆, anisaldehyde/∆, permanganate/∆. Melting points were determined on a Kofler hot stage. Infrared spectra were recorded on a Perkin-Elmer Spectrum One FT-IR spectrometer. Only selected absorbencies (max) are reported. 1H NMR spectra were recorded at 270 or 400 MHz on Jeol Delta GX/270 or Jeol Delta GX/400 instruments, respectively. Chemical shifts (H) are quoted in parts per million (ppm), referenced to TMS, *J* values are given in Hz. 13C NMR spectra were recorded at 67 or 101 MHz on Jeol Delta GX/270 or Jeol Delta GX/400 instruments, respectively. Chemical shifts (C) are quoted in parts per million (ppm), referenced to the appropriate residual solvent peak and are assigned as s, d, t, q for C, CH, CH2, CH3. Degenerate peaks are prefixed by the number of carbons. Low resolution mass spectra (*m/z*) were recorded on a Micromass Analytical Autospec spectrometer with only molecular ions M+ and major peaks being reported with intensities quoted as percentages of the base peak. High-resolution mass spectra were recorded on a Micromass Analytical Autospec spectrometer. GC-MS were performed using an Agilent 6890 apparatus and the following conditions: column: HP190915-433 HP-5MS 5% Phenyl Methyl Siloxane. Capillary 30 m *250 m *0.25 m nominal. Carrier gas: helium 1 mL/min (constant flow mode). Injector: 250 ºC (splitless mode). Detector: Agilent MSD 5973 (EI mode). Oven: 70 ºC (3 min), 15 ºC/min (15.3 min), 300 ºC (8 min). All chemicals were purchased from Aldrich, Fluka, Lancaster or Strem. For purification of reagents see appendix 1. Anhydrous THF, CH2Cl2, hexanes, Et2O, acetonitrile and toluene were obtained from a purification column composed of activated alumina (A-2). For toluene a supported copper catalyst (Q-5 reagent) is also employed.1 Other anhydrous solvents were used as obtained from Aldrich. All reactions were performed in dry glassware under an inert atmosphere of either argon or nitrogen. Reactions at elevated pressure were performed in an Intek MR7 reactor vessel fitted with glass liners containing magnetic stirrer bars. Heating was achieved using a Haake DC30 oil circulating system with the reaction vessel placed on a stirrer plate. 99.0+% pure carbon monoxide was used (Aldrich). **1a**2 **1b**3,4 **1c**4 **1d**5 **1e**6 **1f**,4 **1g**,7 **8a**,8 **8b**8 and **12**9 are known compounds. Spectral data is provided for previously unknown compounds.

#### General method for cyclisation-carbonylation of enynes (Table 2 in paper)

Pd2dba3.CHCl3 (13.0 mg, 0.0125 mmol), phosphine (34.8 mg, 0.15 mmol) and the substrate (if a solid, 0.25 mmol, 1 eq.) were added directly to the reaction tube under nitrogen. DME (0.75 mL) was added and then the substrate (if an oil, 0.25 mmol, 1 eq.). Acetic acid (210 L, 3.75 mmol) was added before the reaction tube was placed in the reaction vessel and the vessel sealed. The vessel was pressurised to 2 atm. with CO and vented, repeating twice. The vessel was pressurised to 2 atm. and then heated at 80 ºC for the required time with stirring. When the reaction is complete, the vessel was allowed to cool to ambient temperature before the pressure was released. The reaction yield can be quantified by filtering the solution through celite followed by removal of solvent under reduced pressure. A known volume of dibenzyl ether is added to the residue obtained and an 1H NMR of the mixture taken from which yields could be calculated. Alternatively the solution can be taken up in diethyl ether (5 mL) and washed with water (10 mL). The aqueous layer extracted with ether (2 × 5 mL, the organic layers combined, dried over magnesium sulfate, filtered and solvent removed under reduced pressure to afford a residue, which after column chromatography affords the products.

#### 4-Carboxymethyl-3-methylene-cyclohexane-1,1-dicarboxylic acid diethyl ester 8f

Pale yellow oil,R*f* 0.35 (50% Et2O:petrol, 0.5% HOAc);max (neat)/cm-1 2981, 1728, 1706, 1651, 1447, 1243;  (400 MHz; CDCl3) 1.17 (6H, t, *J* 7.0, 2  CH2C*H*3), 1.31-1.42 (1H, m, CH2C*H*HCH),1.79-1.89 (2H, m, CH2CH*H*CH and C*H*HCH2CH),2.23-2.31 (1 H, m, CH*H*CH2CH), 2.28 (1H, dd, *J* 15.0 and 7.0, C*H*HCO2H),2.44‑2.60 (2H, m, CH and CCH*H*C), 2.57 (1H, dd, *J* 15.0 and 7.0, CH*H*CO2H),2.83 (1H, m, CCH*H*C),4.06-4.17 (4H, m, 2  C*H*2CH3), 4.63 (1H, s, C=C*H*H), 4.77 (1H, s, C=CH*H*); C (101 MHz; CDCl3) 14.1 (q), 14.1 (q), 30.1, 30.2, 37.1, 38.5, 39.8, 56.8, 61.2 (t), 61.5 (t), 109.6 (t), 145.6 (s), 170.5 (2s), 171.3 (s); *m/z* (EI) 298 (M+, 3%), 224 (30), 165 (53), 104 (46), 84 (100); *m/z* (CI) 299 (M+H+, 12%), 281 (21), 253 (51), 225 (35), 207 (38), 179 (100) (Found: M+H+, 299.1493. C15H21O6 requires M+H+, 299.1495).

#### 2-But-3-enyl-2-ethoxycarbonyl-4-methylene-pentanedioic acid 1-ethyl ester 11f

Colourless oil, R*f* 0.40 (0.5% HOAc, Et2O); max (neat)/cm-1 2981, 1727, 1695, 1445, 1178; (400 MHz; CDCl3) 1.25 (6H, t, *J* 7.0, 2  CH2C*H*3), 1.89-2.04 (4H, m, 2  CH2), 2.98 (2H, s, C*H*2CCO2H), 4.09-4.24 (4H, m, 2  C*H*2CH3), 4.96 (1H, br d, *J* 10.3, CH=CH*H*), 5.02 (1H, dd, *J* 17.2 and 1.5, CH=C*H*H), 5.70-5.81 (1H, m, C*H*=CH2), 5.76 (1H, br s, C=CH*H*), 6.43 (1H, br s, C=C*H*H); C (101 MHz; CDCl3) 14.0 (2q), 28.5 (t), 31.9 (t), 33.3 (t), 57.5 (s), 61.4 (2t), 115.1 (t), 131.3 (t), 135.5 (s), 137.4 (d), 170.9 (2s), 171.9 (s); *m/z* (CI) 299 (M+H+, 74%), 281 (82), 253 (99), 236 (96), 161 (100) (Found: M+H+, 299.1487. C15H23O6 requires M+H+, 299.1495).

#### 3-Carboxymethyl-3-methyl-4-methylene-cyclopentane-1,1-dicarboxylic acid diethyl ester 8c

Colourless oil, R*f* 0.35 (50% Et2O:Petrol); max (neat)/cm-1 2938, 1728, 1706; H (400 MHz, CDCl3) 1.23 (3H, s, CH3), 1.25 (3H, t, *J* 7.2, CH2C*H*3), 1.26 (3H, t, *J* 7.2, CH2C*H*3), 2.35 (1H, d, *J* 14.2, CC*H*HCCH3), 2.49 (1H, *J* 14.7, C*H*HCO2H), 2.44 (1H, *J* 14.7, CH*H*CO2H), 2.72 (1H, d, *J* 14.2, CCH*H*CCH3), 3.03 (1H, dt, *J* 16.7 and 2.0, CC*H*HC=CH2), 3.13 (1H, br d, *J* 16.7, CCH*H*C=CH2), 4.11 (2H, q, *J* 7.1, C*H*2CH3), 4.13 (2H, q, *J* 7.1, C*H*2CH3), 4.75 (1H, t, *J* 2.0, C=C*H*H), 4.90 (1H, t, *J* 2.0, C=CH*H*); C (101 MHz, CDCl3) 14.0 (2q), 27.1 (q), 29.7 (t), 40.6 (t), 43.2 (s), 45.3 (t), 57.8 (s), 61.6 (t), 61.7 (t), 106.3 (t), 156.1 (s), 171.9 (2s), 177.2 (s); *m/z* (CI) 299 (M+H+, 16%), 281 (30), 253 (50), 225 (100) (Found: C, 60.49; H, 7.43. C15H22O6 requires C, 60.39; H, 7.43).

#### 2-{[But-3-enyl-(toluene-4-sulfonyl)-amino]-methyl}-acrylic acid 11g

White needles, mp 93-94.5 ºC (Petrol:Et2O); max (neat)/cm-1 2919, 1686, 1632, 1155; H (400 MHz; CDCl3) 2.22 (2H, dt, *J* 7.7 and 7.0, NCH2C*H*2), 2.43 (3H, s, CH3), 3.23 (2H, t, *J* 7.7, NC*H*2CH2), 4.20 (2H, s, NCH2), 4.99-5.05 (2H, m, CH=C*H*2), 5.65 (1H, ddt, *J* 17.2, 9.5 and 7.0, C*H*=CH2), 6.10 (1H, s, C=C*H*H), 6.53 (1H, s, C=CH*H*), 7.31 (2H, d, *J* 8.4, 2  ArH), 7.71 (2H, d, *J* 8.4, 2  ArH); C (101 MHz; CDCl3) 21.5 (q), 32.9 (t), 48.1 (t), 48.7 (t), 117.3 (t), 127.3 (2d), 129.8 (2d), 130.1 (t), 134.4 (d), 135.3 (s), 136.3 (s), 143.5 (s), 170.3 (s); *m/z* (CI) 310 (M+H+, 100%), 292 (94), 268 (87) (Found: C, 58.49; H, 6.11; N, 4.57. C15H19NO4S requires C, 58.23; H, 6.19; N, 4.53).

#### [3-Methylene-1-(toluene-4-sulfonyl)-piperidin-4-yl]-acetic acid 8g

White plates, mp 133-134 ºC (Petrol:Et2O); max (neat)/cm-1 2936, 2926, 1735, 1160; H (400 MHz; CDCl3) 1.31-1.42 (1H, m, NCH2C*H*H), 1.82 (1H, ddt, *J* 13.2, 4.4 and 3.9, NCH2CH*H*), 2.24 (1H, dd, *J* 15.7 and 7.2, CH*H*CO2H), 2.37 (3H, s, CH3), 2.34-2.39 (1H, m, CH), 2.51-2.60 (1H, m, NC*H*HCH2) 2.55 (1H, dd, *J* 15.7 and 7.2, C*H*HCO2H), 2.99 (1H, d, *J* 12.2, NC*H*HC), 3.53-3.60 (1H, dm, *J* 11.5, NC*H*HCH2), 3.95 (1H, d, *J* 12.2, NCH*H*C), 4.73 (1H, d, *J* 1.5, C=C*H*H), 4.96 (1H, br s, C=CH*H*), 7.26 (2H, d, *J* 8.3, 2  ArH), 7.58 (2H, d, *J* 8.3, 2  ArH); C (400 MHz; CDCl3) 21.7 (q), 31.6 (t), 36.2 (d), 37.1 (t), 45.9 (t), 53.0 (t), 114.0 (d), 128.6 (2d), 130.5 (2d), 134.0 (s), 143.4 (s), 144.0 (s), 176.7 (s); *m/z* (CI) 310 (M+H+, 39%), 292 (55) (Found: C, 57.93; H, 5.92; N, 4.52. C15H19NO4S requires C, 58.23; H, 6.19; N, 4.53).

## References

1 A. B. Pangborn, M. A. Giardello, R. H. Grubbs, R. K. Rosen and F. Timmers, J. *Organometallics* **1996**, *15*, 1518.

2 D. P. Becker and D. L. Flynn, *Tetrahedron* **1993**, *49*, 5047.

3 T. Kobayashi, Y. Koga and K. Narasaka, *J. Organomet. Chem* **2001**, *624*, 73.

4 B. L. Pagenkopf and T. Livinghouse, *J. Am. Chem. Soc.* **1996**, *118*, 2285.

5 S. J. Sturla and S. L. Buchwald, *J. Org. Chem.* **1999**, *64*, 5547.

6 M. Ishizaki and O. Hoshino, *Tetrahedron* **2000**, *56*, 8813.

7 S. Watanuki and M. Mori, *Organometallics* **1995**, *14*, 5054.

8 V. K. Aggarwal, P. W. Davies and W. O. Moss, *Chem. Commun.* **2002**, 972.

9 T. A. Kirkland and R. H. Grubbs, *J. Org. Chem.* **1997**, *62*, 7310.
